# Supplementary material for: Bridging repair of the abdominal wall in a rat experimental model. Comparison between uncoated and polyethylene oxide-coated equine pericardium meshes
Source: PubMed Central journal article supplement (PMC7181852; doi:10.1038/s41598-020-63886-9), 2020-04-24

**Bridging repair of the abdominal wall in a rat experimental model. Comparison between uncoated and polyethylene oxide-coated equine pericardium meshes.**

Alessandro Pasculli, Angela Gurrado, Giuseppe Massimiliano De Luca, Antonietta Mele, Andrea Marzullo, Annarosa Mangone, Saverio Cellamare, Valentina Ferraro, Fatima Maqoud, Maria Cristina Caggiani, Francesco Rana, Giuseppe Cavallaro, Francesco Paolo Prete, Domenico Tricarico, Cosimo Damiano Altomare, Mario Testini

Supplementary material:

Supplementary Table S1

Supplementary Figures S1-S7

**Supplementary Table S1 – Raman lines of the samples analysed.**

| Group A |        |      |      | Group B |      |      |      | Group B (crusted side) |      |      | Assignment                                               | References |
|---------|--------|------|------|---------|------|------|------|------------------------|------|------|----------------------------------------------------------|------------|
| A0      | A1     | A2   | A3   | B0      | B1   | B2   | B3   | B1 w                   | B2 w | B3 w |                                                          |            |
|         |        |      |      |         | 426  | 430  |      | 427                    | 432  | 429  | $\nu_2(\text{PO}_4)^{-3}$                                | [36, 37]   |
| 530     | 532    | 531  | 531  | 531     | 532  | 533  | 535  | 532                    | 537  | 533  | $\nu(\text{S-S})$                                        | [34]       |
| 570     |        | 571  | 567  | 570     |      |      | 570  |                        |      |      | Trp?                                                     | [40]       |
|         |        |      | 579  |         |      | 583  |      | 582                    | 580  | 580  | –                                                        |            |
|         |        |      |      |         |      |      | 594  | 592                    |      | 592  | $\nu_4(\text{PO}_4)^{-3}$                                | [36]       |
|         |        |      |      |         |      |      |      |                        |      |      | $\nu_2(\text{PO}_4)^{-3}$                                | [37]       |
| 602     |        | 599  | 600  | 600     |      |      |      |                        |      |      | –                                                        |            |
| 620     |        | 621  | 621  | 620     | 620  |      | 621  |                        |      |      | Phe                                                      | [38]       |
|         |        | 644  | 644  |         |      |      | 645  |                        |      |      | $\tau(\text{CC})$ Tyr, Phe                               | [40]       |
|         | 666    |      |      |         | 665  |      |      | 665                    |      |      | $\nu(\text{C-S})$ cystine                                | [40]       |
| 694     |        | 696  | 696  |         | 698  |      | 698  |                        |      |      | –                                                        |            |
| 720     |        | 724  | 724  | 721     |      |      | 724  |                        |      | 721  | $\delta(\text{CH}_2)$                                    | [33]       |
| 756     | 758    | 758  | 758  | 758     |      |      | 761  |                        |      |      | Trp?                                                     | [35, 40]   |
| 814     | 814    | 814  | 818  | 815     | 817  | 816  | 817  |                        |      |      | $\nu(\text{CC})$                                         | [40]       |
|         |        |      |      |         |      |      |      |                        |      |      | $\nu(\text{CC}), \delta(\text{CO}_2)$<br>proteinbackbone | [39]       |
| 831     |        |      | 830  |         |      |      |      |                        |      |      | Pro, Hyp, Tyr                                            | [40]       |
|         |        |      |      |         |      |      |      | 848                    | 847  | 846  | –                                                        |            |
|         |        |      |      |         |      |      |      |                        |      |      | $\nu(\text{CC})$ Pro,                                    | [33-36,    |
| 855     | 854    | 854  | 854  | 854     | 855  | 854  | 857  |                        |      | 857  | $\delta(\text{CCH})$ Tyr                                 | 38-40]     |
| 874     | 873    | 873  | 873  | 873     | 875  | 872  | 875  |                        |      | 876  | $\nu(\text{CC})$ Hyp                                     | [33-36]    |
|         |        |      |      |         |      |      |      |                        |      |      | $\nu(\text{CC}), \delta(\text{CCH})$<br>Hyp              | [39]       |
|         |        |      |      |         |      |      |      |                        |      |      |                                                          | [34, 36,   |
| 920     | 920    | 920  | 920  | 920     | 920  | 920  | 921  |                        |      |      | $\nu(\text{CC})$ Pro ring                                | 38-40]     |
|         |        |      |      |         |      |      |      |                        |      |      |                                                          | [33, 34,   |
| 938     | 938    | 938  | 938  | 939     | 938  |      | 939  |                        |      |      | $\nu(\text{CC})$ $\alpha$ helix                          | 36, 38-40] |
|         |        |      |      | 960     | 960  | 960  | 959  | 960                    | 960  | 960  | $\nu_1(\text{PO}_4)^{-3}$                                | [36, 37]   |
| 968     |        |      | 968  |         |      |      |      |                        |      |      | Amide III                                                | [38]       |
|         |        |      |      |         |      |      |      |                        |      |      | $\nu_s(\text{CC})$ ring                                  | [33, 36-   |
| 1002    | 1004   | 1004 | 1004 | 1003    | 1004 | 1002 | 1004 | 1004                   | 1004 | 1003 | breathing Phe                                            | 40]        |
| 1031    | 1033vw | 1033 | 1033 | 1031    | 1033 | 1030 | 1033 |                        | 1031 | 1030 | $\delta(\text{CH})$ Phe                                  | [34, 35]   |

|      |      |      |      |      |      |      |      |      |                                      |                                                                            |                                    |      |
|------|------|------|------|------|------|------|------|------|--------------------------------------|----------------------------------------------------------------------------|------------------------------------|------|
| 1043 | 1045 | 1045 | 1045 | 1043 | 1043 | 1047 |      | 1043 | o.p. $\delta(\text{OH})$<br>carboxyl | [38]                                                                       |                                    |      |
|      |      |      |      |      |      |      |      |      | Pro                                  | [40]                                                                       |                                    |      |
| 1054 | 1050 |      |      |      |      |      |      |      | –                                    |                                                                            |                                    |      |
| 1062 | 1062 | 1062 | 1061 | 1060 | 1061 | 1062 |      |      | $\delta(\text{COC})$                 | [33]                                                                       |                                    |      |
|      |      |      |      | 1070 | 1071 |      | 1071 | 1072 | 1071                                 | $\nu_1(\text{CO}_3)^{-2}, \nu_3(\text{PO}_4)^{-3}$                         | [36, 37]                           |      |
|      |      |      |      | 1076 |      |      |      |      |                                      | $\nu_3(\text{PO}_4)^{-3}$                                                  | [36, 40]                           |      |
| 1082 | 1080 | 1085 |      | 1080 |      | 1080 |      |      |                                      | $\delta(\text{CN})/(\text{CC})$                                            | [33]                               |      |
| 1100 | 1097 |      | 1100 | 1100 | 1098 | 1100 |      | 1102 |                                      | $\nu_{\text{as}}(\text{COC})$                                              | [33]                               |      |
| 1126 | 1125 | 1125 | 1125 | 1126 | 1126 | 1125 | 1126 | 1127 | 1126                                 | $\nu(\text{COC}), \nu(\text{CN})$                                          | [33, 35]                           |      |
|      |      |      |      | 1142 | 1145 | 1142 |      | 1143 |                                      | –                                                                          |                                    |      |
| 1164 | 1163 | 1163 | 1163 | 1163 | 1165 | 1161 | 1163 | 1164 |                                      | Tyr                                                                        | [40]                               |      |
| 1175 | 1175 | 1175 | 1175 | 1175 | 1175 | 1175 | 1175 | 1176 |                                      | $\nu(\text{CC})$ Tyr                                                       | [33, 38]                           |      |
|      |      |      |      |      |      |      |      |      |                                      |                                                                            | [36, 38,                           |      |
| 1206 | 1206 | 1206 | 1206 | 1205 | 1205 | 1205 | 1205 | 1205 |                                      | $\omega(\text{CH}_2)$ Tyr, Hyp                                             | 40]                                |      |
|      |      |      |      |      |      |      |      |      |                                      | Amide III $\nu(\text{CN})$                                                 | [33, 36-                           |      |
| 1236 |      |      |      | 1237 |      | 1238 |      | 1236 | 1236                                 | $\delta(\text{NH})$                                                        | 39]                                |      |
|      |      |      |      |      |      |      |      |      |                                      | Amide III $\nu(\text{CN})$                                                 | [33, 36-                           |      |
| 1246 | 1248 | 1244 | 1248 | 1244 | 1244 | 1247 | 1244 |      |                                      | $\delta(\text{NH})$                                                        | 39]                                |      |
|      |      |      |      |      |      |      |      |      |                                      | Amide III $\nu(\text{CN})$                                                 | [36, 38,                           |      |
| 1269 | 1270 | 1269 | 1266 | 1269 | 1271 | 1270 | 1271 | 1270 |                                      | $\delta(\text{NH})$                                                        | 39]                                |      |
|      |      |      |      |      |      |      |      |      |                                      |                                                                            | [33, 36,                           |      |
| 1278 | 1278 | 1278 |      | 1277 |      | 1280 |      | 1281 |                                      | Amide III                                                                  | 40]                                |      |
|      | 1300 | 1299 |      |      |      |      |      |      |                                      | $\tau(\text{CH}_2), \omega(\text{CH}_3,$<br>$\text{CH}_2) / \text{lipids}$ | [40]                               |      |
|      | 1317 | 1317 | 1317 |      | 1316 | 1317 |      |      |                                      | $\tau(\text{CH}_3, \text{CH}_2)$                                           | [38, 40]                           |      |
| 1341 | 1341 | 1340 | 1340 | 1344 | 1344 | 1345 | 1344 |      |                                      | $\omega(\text{CH}_3, \text{CH}_2)$                                         | [33, 38]                           |      |
| 1366 | 1366 | 1366 |      |      |      |      |      |      |                                      | Trp?                                                                       | [40]                               |      |
| 1376 | 1378 | 1378 |      | 1378 | 1378 |      | 1378 |      |                                      | $\delta(\text{CH}_3)$ lipids                                               | [40]                               |      |
| 1385 |      | 1388 |      | 1386 | 1386 | 1386 |      |      |                                      | $(\text{CH}_3)?$                                                           | [40]                               |      |
| 1395 | 1395 | 1395 | 1395 | 1398 | 1398 |      | 1398 |      |                                      | $\delta(\text{CH}_2)$                                                      | [33, 40]                           |      |
| 1423 | 1425 | 1425 | 1425 | 1423 | 1422 | 1422 | 1425 | 1422 |                                      | $\nu(\text{COO}^-)$                                                        | [33, 38]                           |      |
|      |      |      |      |      |      |      |      |      |                                      |                                                                            | [35, 37,                           |      |
| 1450 | 1448 | 1448 | 1448 | 1451 | 1449 | 1450 | 1452 | 1448 | 1450                                 | 1448                                                                       | $\delta(\text{CH}_3, \text{CH}_2)$ | 38]  |
| 1460 |      |      |      | 1464 | 1463 | 1464 | 1463 |      |                                      |                                                                            | $\delta(\text{CH}_3, \text{CH}_2)$ | [38] |

|      |      |      |      |      |      |      |      |      |      |      |                                       |          |
|------|------|------|------|------|------|------|------|------|------|------|---------------------------------------|----------|
|      |      |      |      |      |      |      |      | 1479 | 1477 |      | –                                     |          |
| 1556 | 1556 | 1556 | 1556 | 1558 | 1556 |      |      |      |      |      | v(CC) Trp?                            | [35, 40] |
|      |      |      |      |      |      |      |      |      |      |      | v(CCH) aromatic                       |          |
| 1585 | 1578 | 1584 | 1584 |      |      |      |      |      |      |      | Pro, Hyp                              | [36, 38] |
| 1606 | 1608 | 1606 | 1606 | 1606 | 1607 |      | 1607 |      |      |      | δ(CC)Phe, Tyr                         | [36, 38] |
|      |      |      |      |      |      |      |      |      |      |      |                                       | [36, 38, |
| 1639 |      | 1636 |      | 1640 | 1640 | 1640 | 1640 | 1635 |      |      | v(C=C) Amide I                        | 40]      |
|      |      |      |      |      |      |      |      |      |      |      |                                       | [33, 36- |
| 1668 | 1658 | 1658 | 1658 | 1668 | 1663 | 1666 | 1667 | 1663 |      |      | v(C=O) Amide I                        | 39]      |
|      |      |      | 1684 |      |      |      | 1680 |      |      |      | Amide I                               | [40]     |
|      |      |      |      |      |      |      |      |      | 1695 |      |                                       |          |
|      |      |      | 1746 |      |      |      |      |      |      |      | v(C=O) lipids                         | [40]     |
|      |      |      | 2734 | 2729 |      |      | 2735 |      |      |      | –                                     |          |
|      |      | 2853 | 2853 | 2853 |      |      |      |      |      |      | v(CH <sub>3</sub> , CH <sub>2</sub> ) | [40]     |
|      |      |      |      |      |      |      |      |      |      |      |                                       | [33, 37, |
| 2881 | 2884 | 2882 | 2882 | 2880 | 2882 | 2880 | 2883 | 2885 | 2880 | 2880 | v(CH <sub>3</sub> , CH <sub>2</sub> ) | 40]      |
|      |      |      |      |      |      |      |      |      |      |      |                                       | [33, 37, |
| 2939 | 2936 | 2938 | 2933 | 2940 | 2940 | 2940 | 2941 | 2940 | 2938 | 2940 | v(CH <sub>3</sub> , CH <sub>2</sub> ) | 40]      |
|      |      |      |      |      |      |      |      |      |      |      |                                       | [33, 37, |
| 2980 | 2979 | 2979 |      | 2979 | 2978 | 2982 | 2983 | 2978 |      |      | v(CH <sub>3</sub> , CH <sub>2</sub> ) | 40]      |
|      | 3008 |      | 3006 |      |      |      |      |      |      |      | v <sub>as</sub> (=CH) lipids          | [40]     |
| 3066 | 3062 | 3062 | 3062 | 3063 | 3062 | 3063 | 3063 | 3064 |      |      | v(C=CH)                               | [33]     |
| 3210 |      | 3209 | 3209 |      |      |      |      |      |      |      | –                                     |          |
| 3318 | 3318 | 3318 | 3318 | 3318 | 3318 | 3318 | 3318 | 3315 |      |      | v <sub>s</sub> (NH)                   | [33]     |

All data are reported as cm<sup>-1</sup>. Group A: non-coated prosthesis; Group B: coated prosthesis. A1 and B1: evaluation after 30 days; A2 and B2: evaluation after 60 days; A3 and B3: evaluation after 90 days.

Phosphate and carbonate positions are reported in italics. v: stretching, v<sub>s</sub>: symmetric stretching, v<sub>as</sub>: antisymmetric stretching, δ: bending, τ: twisting, ω: wagging, o.p.: out of plane, Trp: tryptophan, Phe: phenylalanine, Tyr: tyrosine, Pro: proline, Hyp: hydroxyproline.

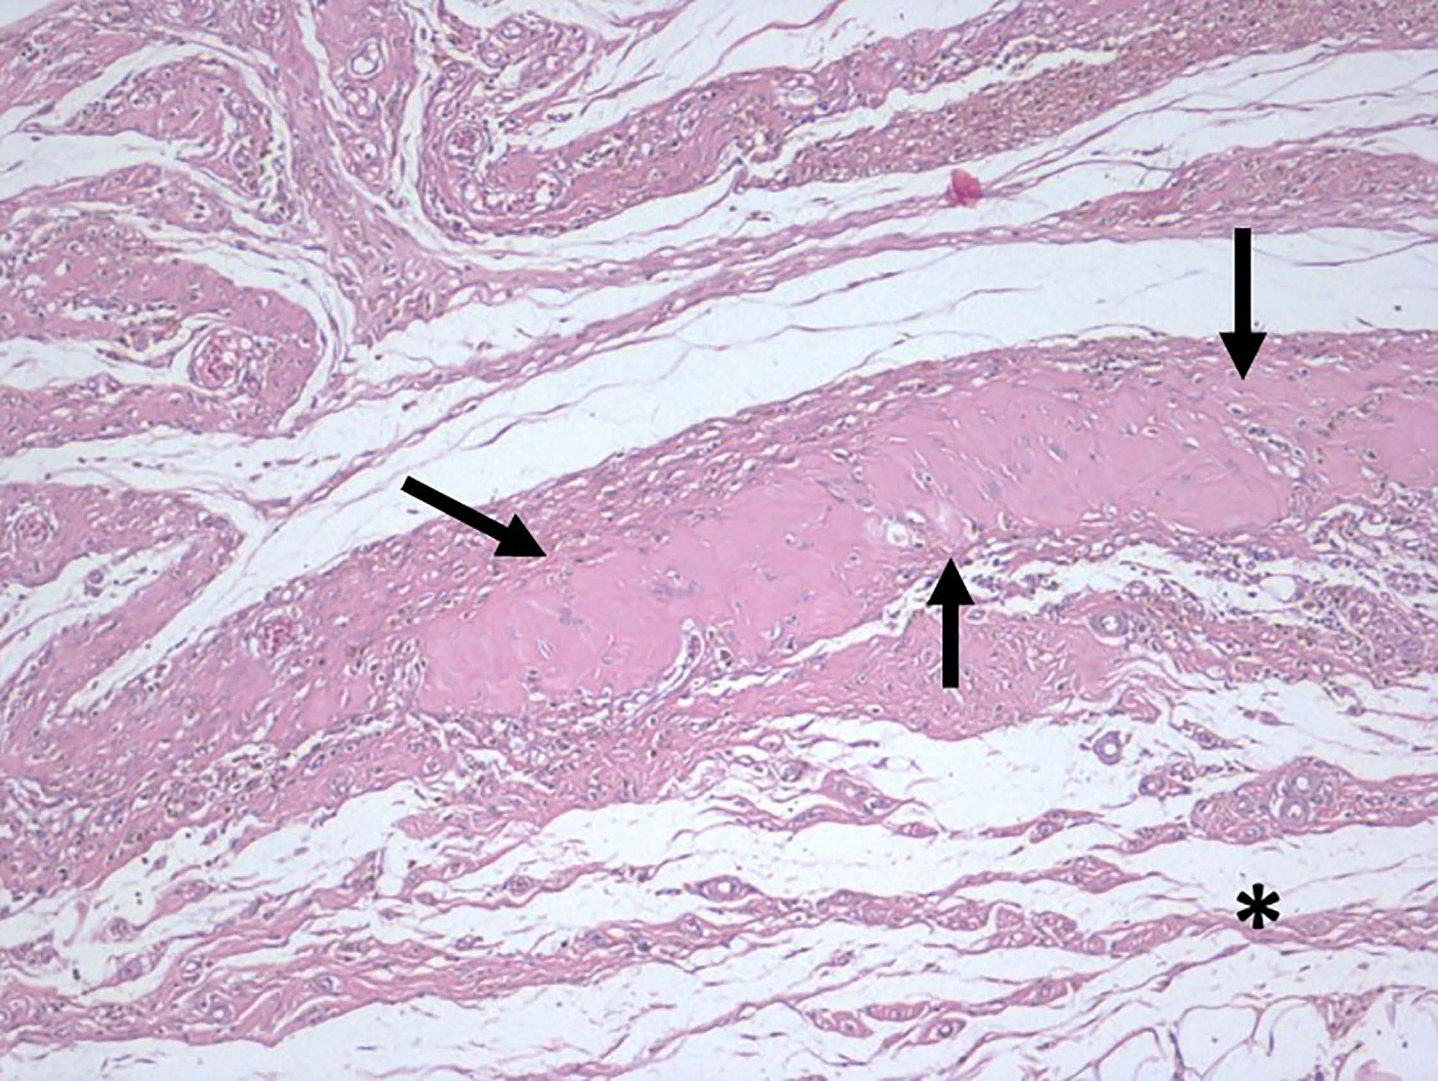

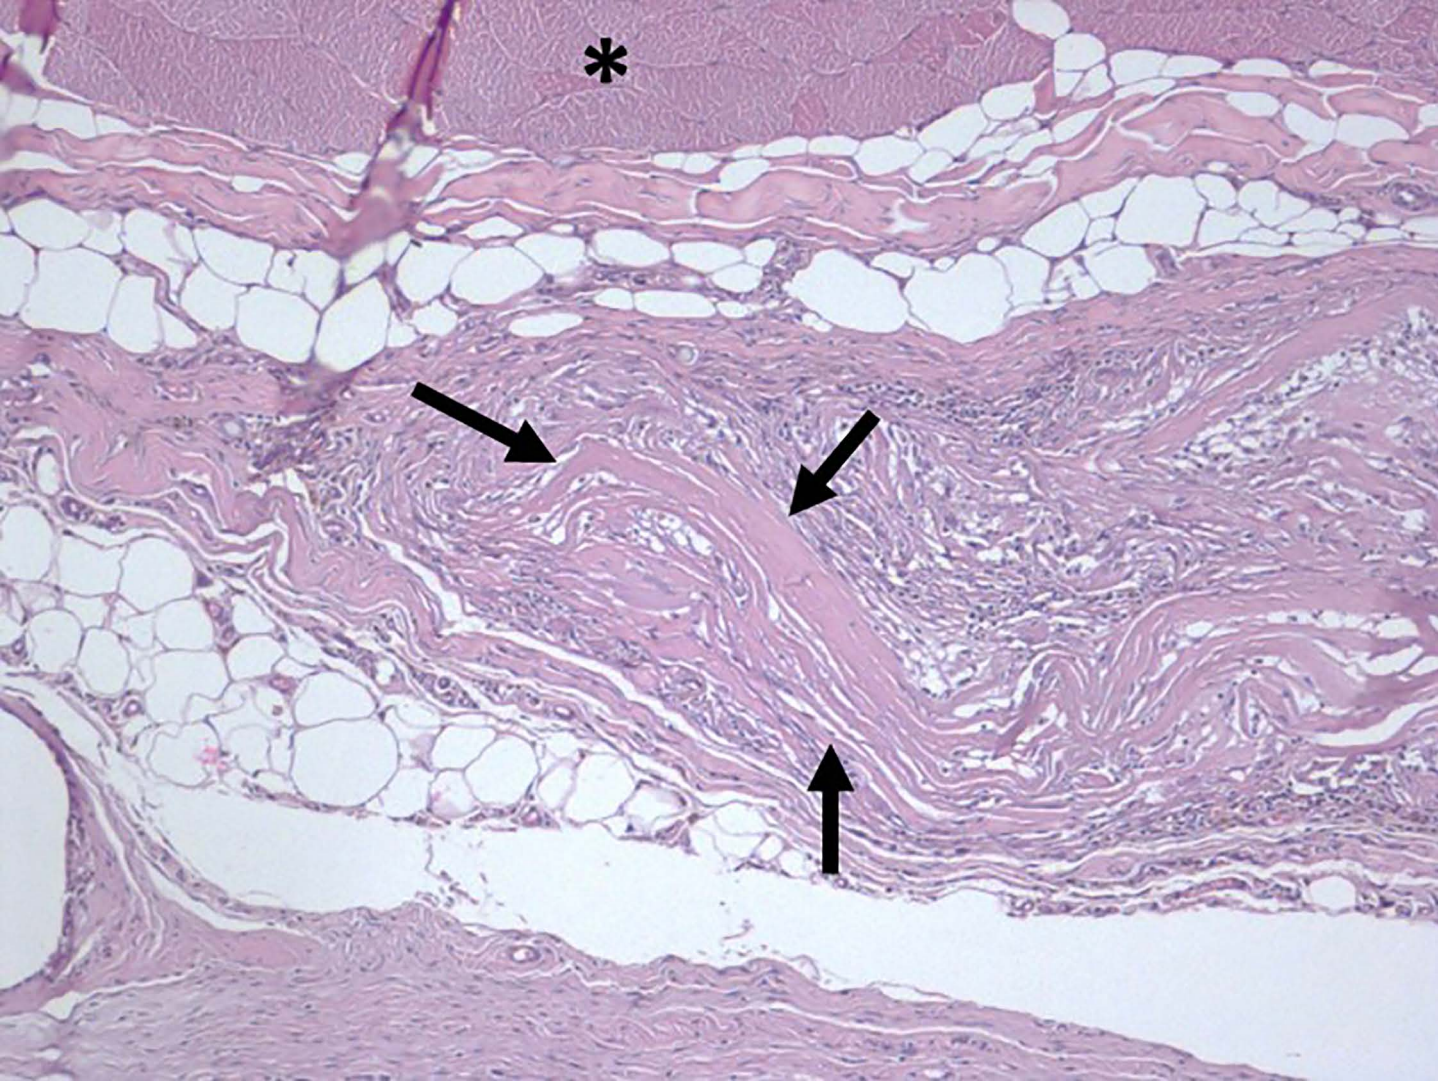

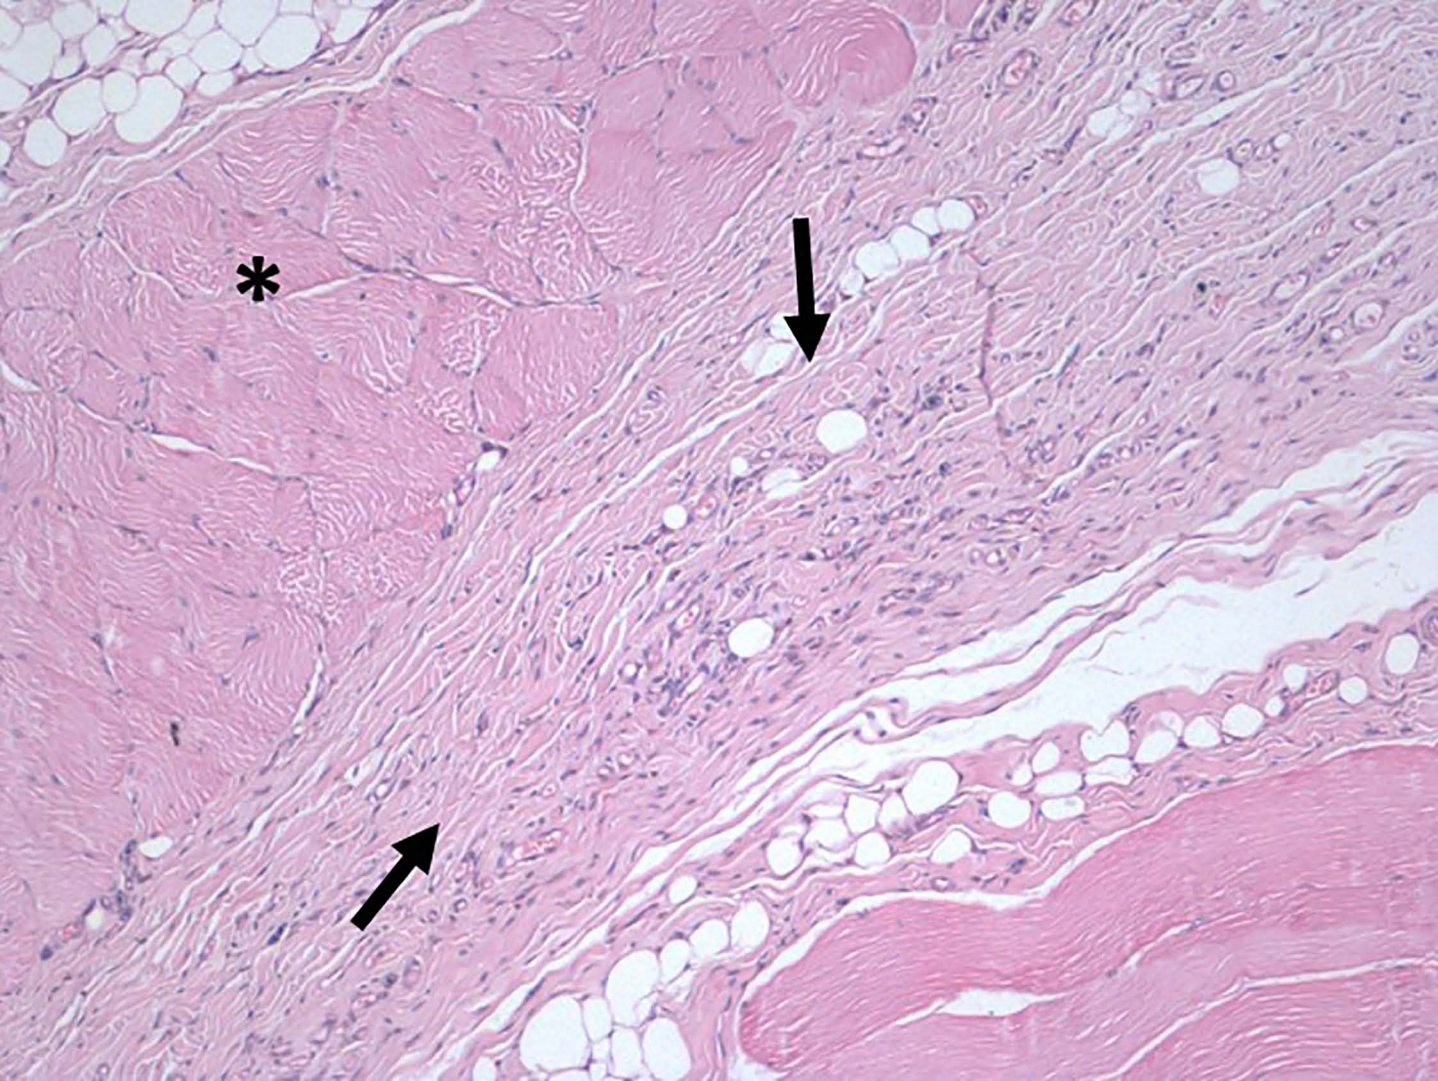

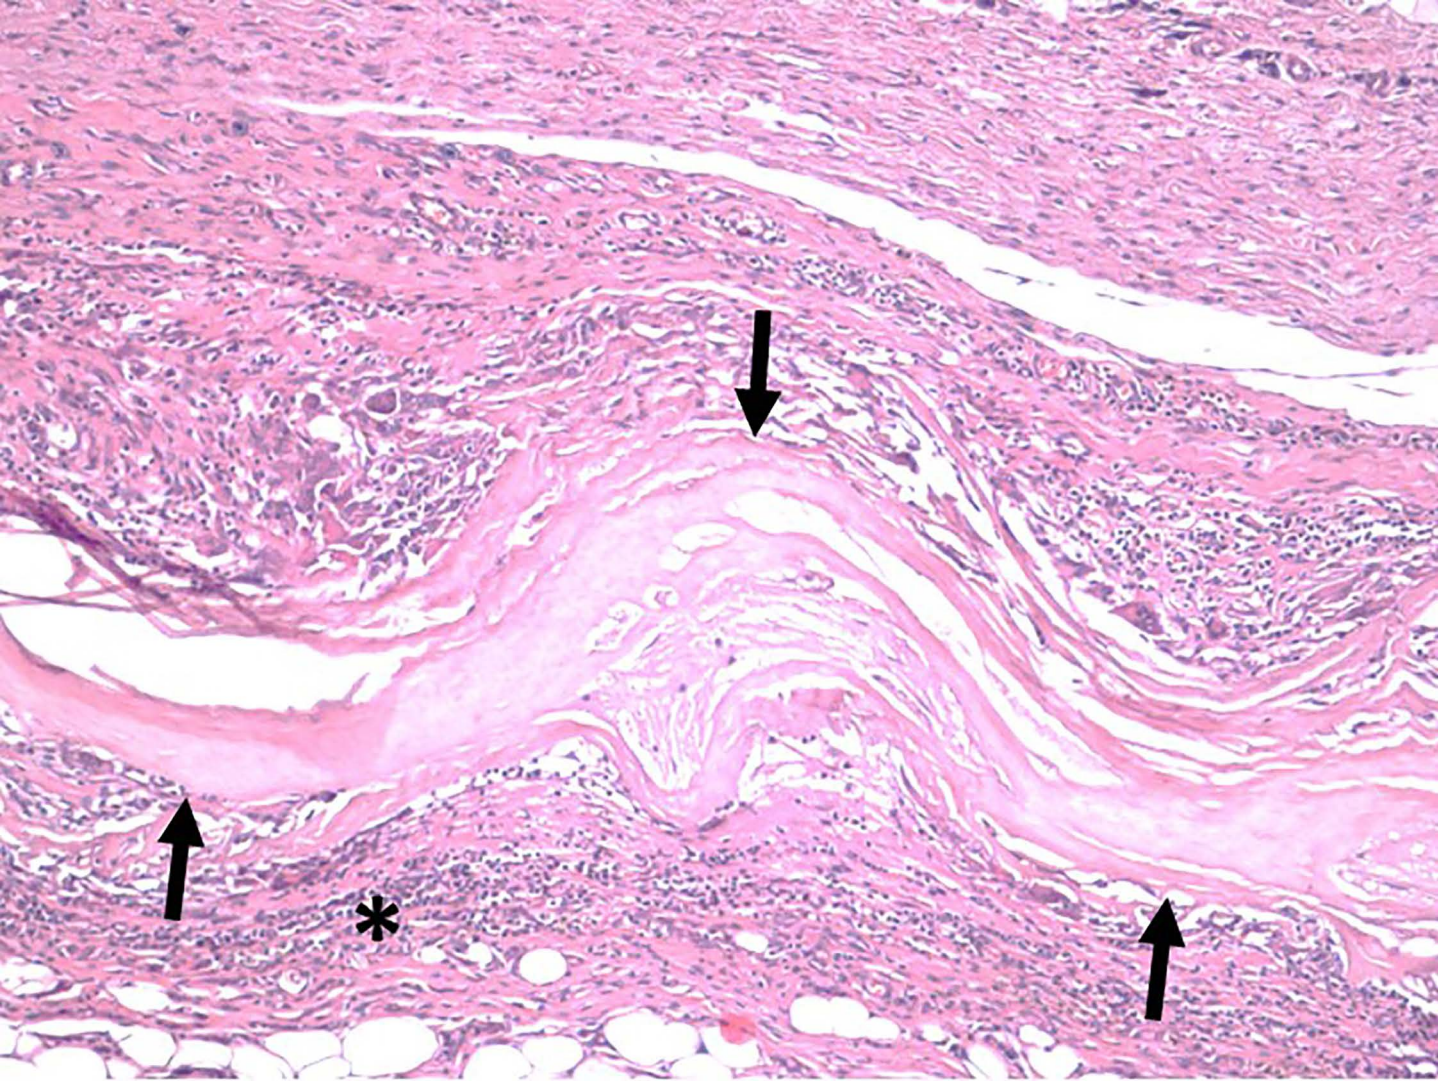



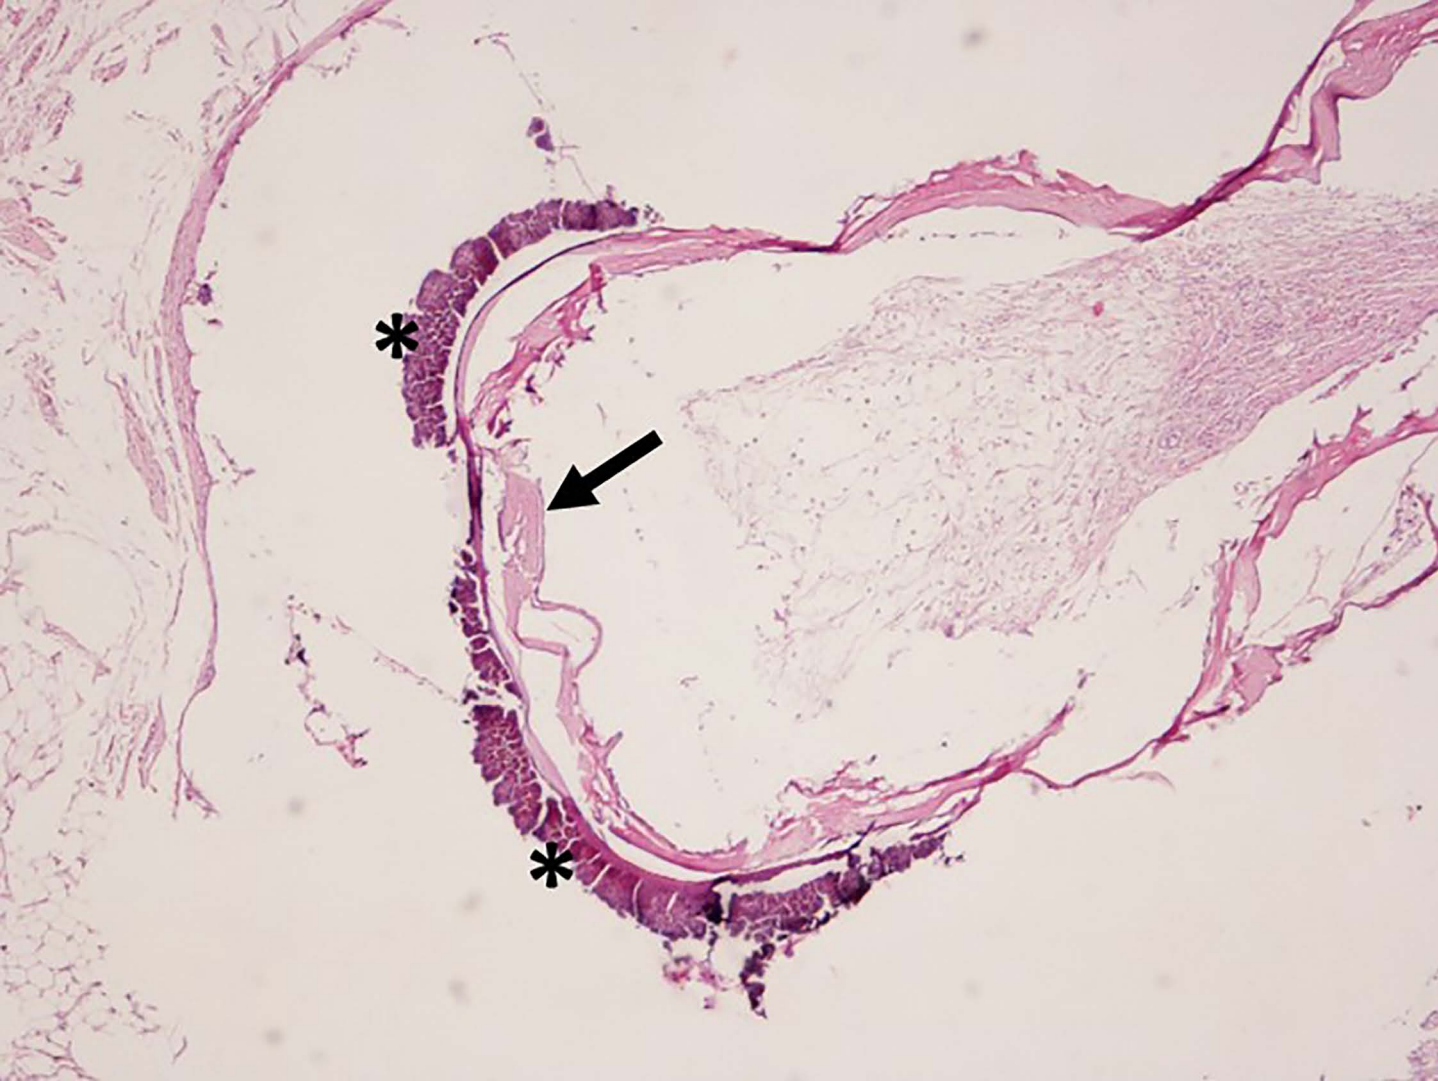

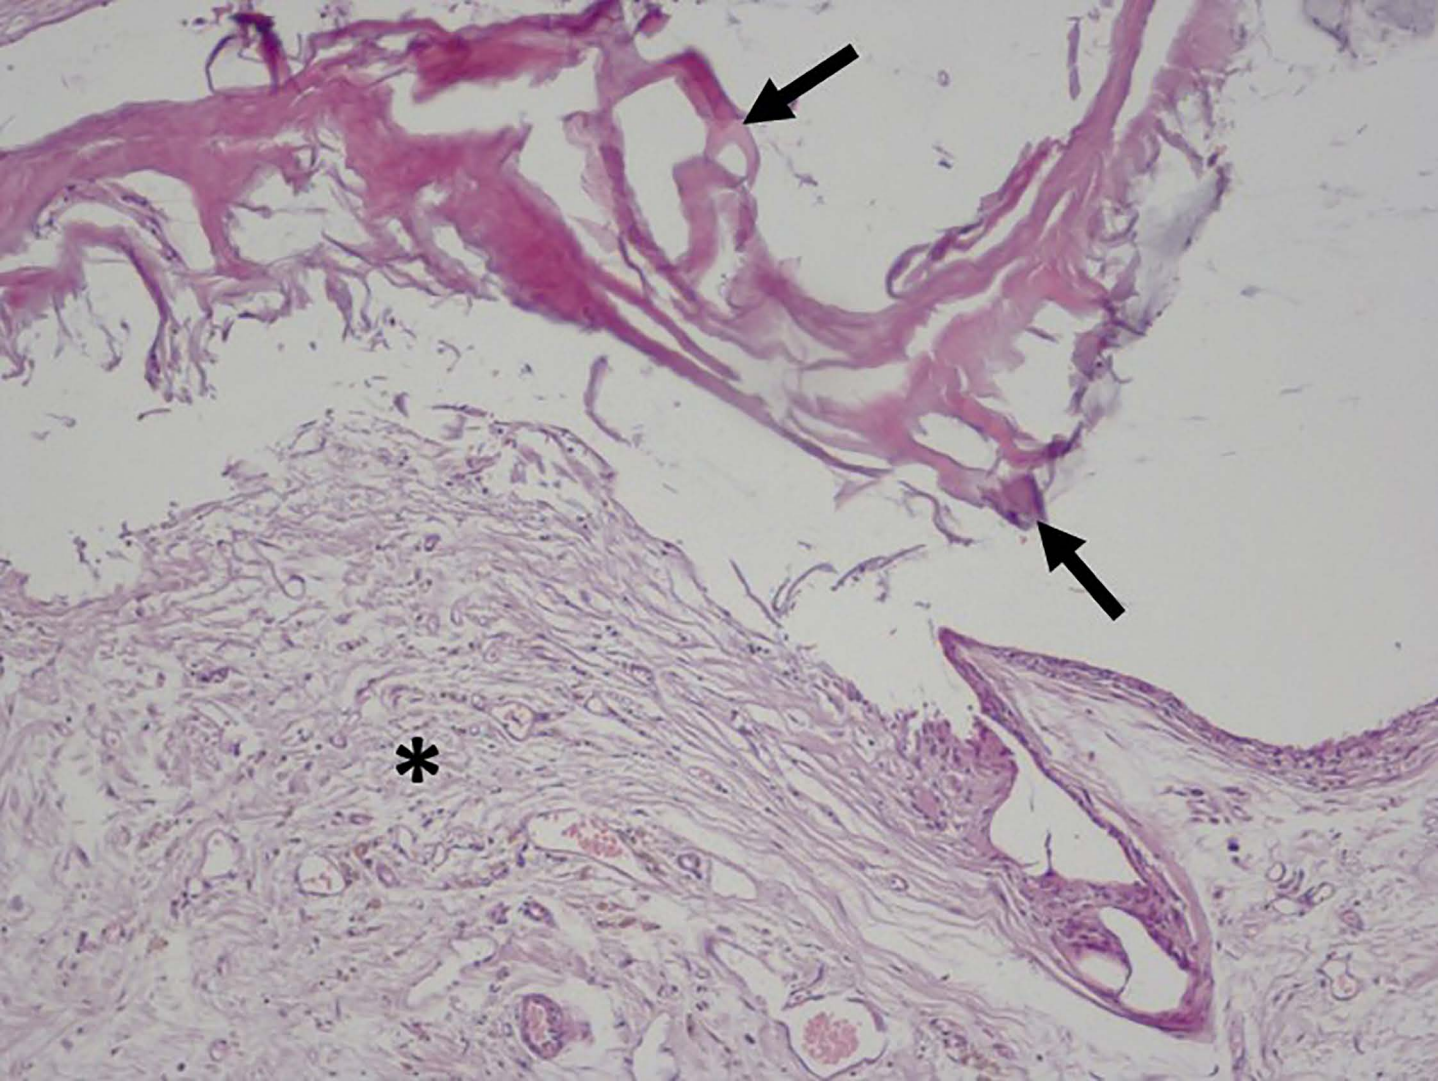

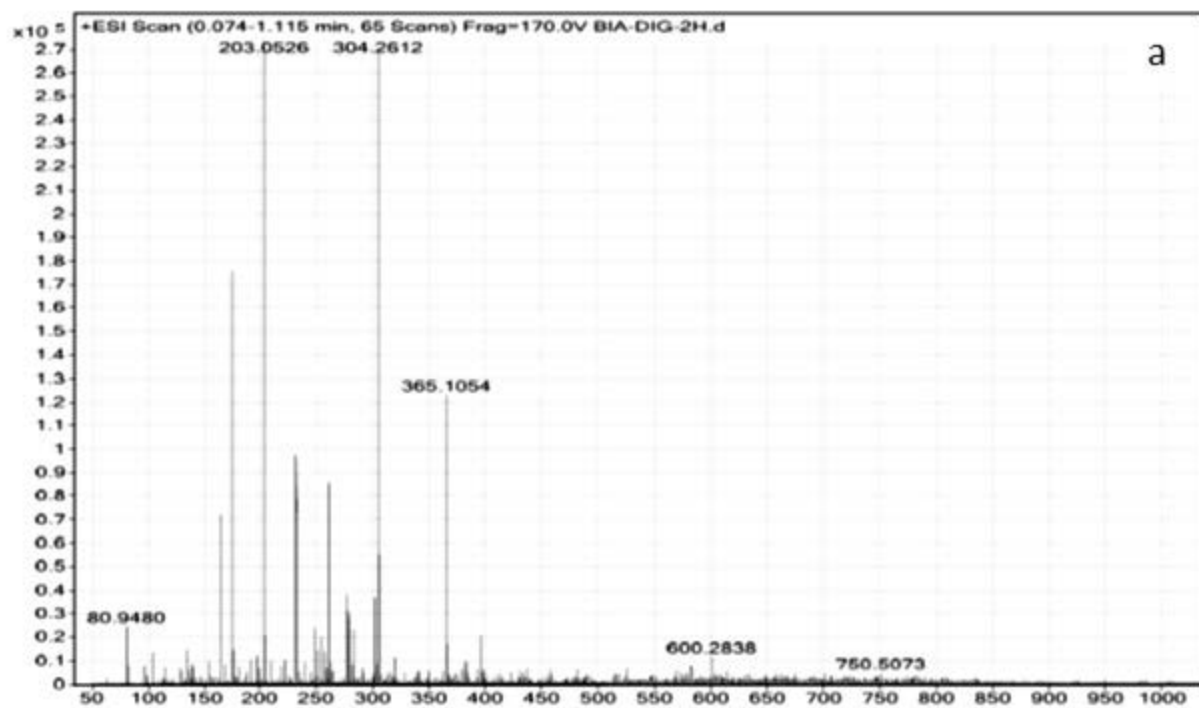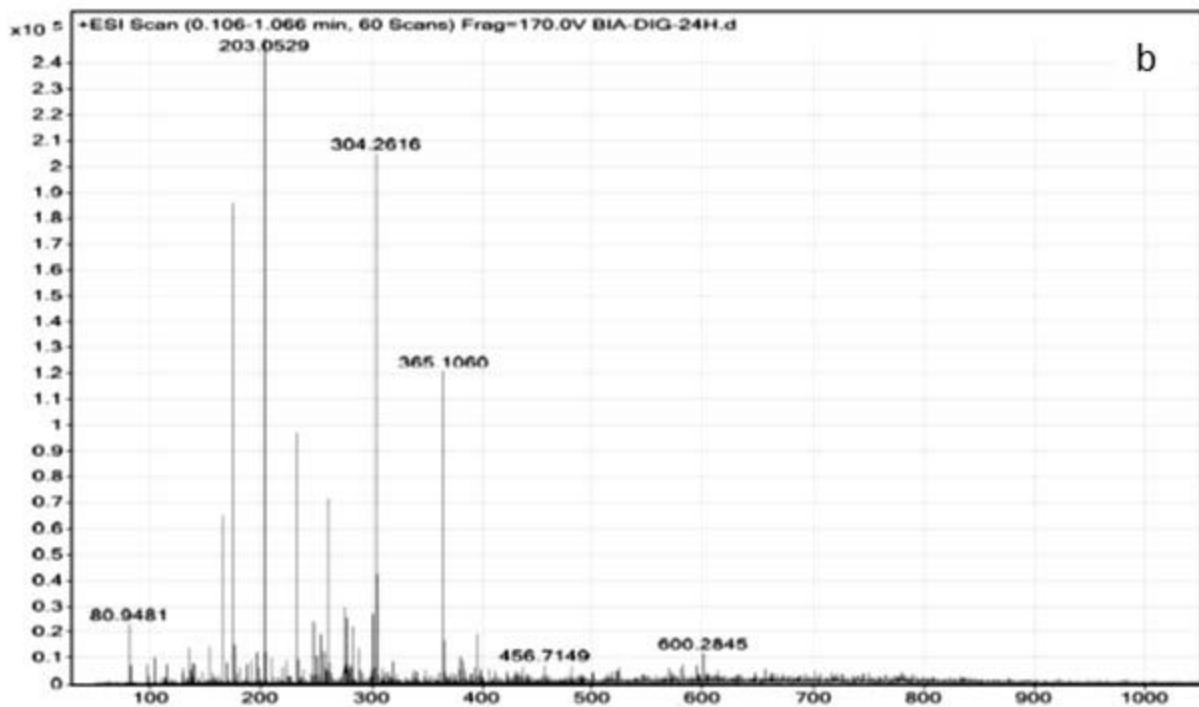

Supplement: 41598_2020_63886_MOESM1_ESM.pdf [file 41598_2020_63886_MOESM1_ESM.pdf]
